# Supplementary material for: A mechanical–optical coupling design on solar and thermal radiation modulation for thermoregulation
Source: Royal Society of Chemistry journal article supplement (doi:10.1039/d4ta03388d), 2024-01-01
Supplement: d4ta03388d1.pdf [file d4ta03388d1.pdf]

## Supporting information

### **A mechanical-optical coupling design on solar and thermal radiation modulation for thermoregulation**

Na Guo <sup>1</sup>, Changmin Shi <sup>2,\*</sup>, Brian W. Sheldon<sup>2</sup>, Hongjie Yan <sup>1</sup>, Meijie Chen <sup>1,\*</sup>

<sup>1</sup> School of Energy Science and Engineering, Central South University, Changsha 430001, China

<sup>2</sup> School of Engineering, Brown University, Providence, RI 02906, USA.

\* Corresponding Authors. [chenmeijie@csu.edu.cn](mailto:chenmeijie@csu.edu.cn) (M. Chen); [changmin\\_shi@brown.edu](mailto:changmin_shi@brown.edu) (C. Shi)

## Section S1 Net power calculation

Net cooling power  $P_{cooling}$  or heating power  $P_{heating}$  was calculated based energy balance equation when the ambient temperature  $T_{amb}$  is equal to the coating temperature  $T_c$ :

$$P_{cooling} = P_{rad} - P_{sol} - P_{atm} \quad (1)$$

$$P_{heating} = P_{sol} + P_{atm} - P_{rad} \quad (2)$$

where  $P_{sol}$  is the absorbed solar radiation.  $P_{atm}$  is the absorbed radiation power from the atmosphere.  $P_{rad}$  is the radiation power of the coating.

$P_{sol}$  can be calculated from the following equation:

$$P_{sol}(T_c) = \alpha(\lambda, T_c) I_{sol}(\lambda) d\lambda \quad (3)$$

where  $\lambda$  is the wavelength.  $\alpha(\lambda, T_c)$  is the spectral absorptance of the coating.  $I_{sol}(\lambda)$  is the solar intensity.

$P_{atm}$  can be calculated from the following equation:

$$P_{atm}(T_{amb}) = \int \varepsilon_{atm}(\lambda) \alpha(\lambda) I_B(\lambda, T_{amb}) d\lambda \quad (4)$$

where  $\varepsilon_{atm}(\lambda)$  is the emittance of the atmosphere.  $\alpha(\lambda)$  is the spectral absorptance of the SEBS@Ag film.  $I_B(\lambda, T_{amb})$  is the spectral radiation intensity of the blackbody (the temperature is the same as the ambient temperature), which can be calculated according to Planck's law:

$$I_B(\lambda, T) = \frac{c_1 \lambda^{-5}}{e^{\frac{c_2}{\lambda T}} - 1} \quad (5)$$

where  $c_1$  is the first radiation constant with the value of  $3.7419 \times 10^{-16}$  W·m<sup>2</sup>, and  $c_2$  is the second radiation constant with the value of  $1.4388 \times 10^{-2}$  m·K.

$P_{rad}$  can be calculated from the Stefan-Boltzmann formula:

$$P_{rad}(T) = \int \alpha(\lambda) I_B(\lambda, T_c) d\lambda \quad (6)$$

where  $I_B(\lambda, T_c)$  is the spectral radiation intensity of the blackbody and the temperature is the same as the coating.

The average solar reflectance and transmittance can be defined as:

$$\bar{R}_{sol} = \frac{\int_{0.3\mu m}^{2.5\mu m} R(\theta, \lambda) I_{sol}(\lambda) d\lambda}{\int_{0.3\mu m}^{2.5\mu m} I_{sol}(\lambda) d\lambda} \quad (7)$$

$$\bar{\tau}_{sol} = \frac{\int_{0.3\mu m}^{2.5\mu m} \tau(\theta, \lambda) I_{sol}(\lambda) d\lambda}{\int_{0.3\mu m}^{2.5\mu m} I_{sol}(\lambda) d\lambda} \quad (8)$$

The average thermal reflectance and transmittance in  $\lambda = 8 - 13 \mu m$  (i.e., the atmospheric transparent window) are usually used to determine the radiative cooling performance as follows:

$$\bar{R}_{LWIR} = \frac{\int_{8\mu m}^{13\mu m} I_B(\lambda, T_c) R(T_c, \lambda) d\lambda}{\int_{8\mu m}^{13\mu m} I_B(\lambda, T_c) d\lambda} \quad (9)$$

$$\bar{\tau}_{LWIR} = \frac{\int_{8\mu m}^{13\mu m} I_B(\lambda, T_c) \tau(T_c, \lambda) d\lambda}{\int_{8\mu m}^{13\mu m} I_B(\lambda, T_c) d\lambda} \quad (10)$$

## Section S2: Energy-saving calculation

A conventional rectangular building (12 m x 10 m x 4 m) was built, the roof area of the building was  $A = 120 \text{ m}^2$  in Figure 3e. The ASHRAE (American Society of Heating, Refrigerating, and Air-Conditioning Engineers) database was used for material parameters. The walls of the building were made of stucco, concrete, wall insulation, and gypsum, thermal conductivity was 0.69, 1.73, 0.04, and 0.16  $\text{W m}^{-1} \text{K}^{-1}$ , respectively. The exterior doors were made of insulation board and metal surface, and thermal conductivity was 0.03 and 45.30  $\text{W m}^{-1} \text{K}^{-1}$ , respectively. The stretchable SEBS@Ag film covered the roof glass. The annual meteorological data, including hourly temperature, solar radiation intensity, and outdoor humidity, can be obtained from the weather database in EnergyPlus. HVAC systems were set up in the room to calculate the energy consumption of the building. When the indoor temperature was below 20 °C, it heated the room, and when above 28 °C, it cooled the room. The HVAC systems were turned on from 8 a.m. to 5 p.m., excluding two weekends per week, and the indoor personnel density was 2  $\text{m}^2$  / person, excluding the impact of the use of other electrical appliances.

### Section S3: SEBS intrinsic absorption coefficient calculation

The transmittance of a SEBS film without a metal layer at the bottom can be expressed according to Beer-Lambert law:

$$\tau = (1 - R_1)^2 e^{-\mu_p l} = (1 - R_1)^2 e^{-\mu_p d} \quad (11)$$

where  $R_1$  is the reflectance of the SEBS/air interface (Fresnel reflection).  $\mu_p$  is the absorption coefficient.  $l$  is the length of the light path,  $d$  is the thickness of the SEBS film.

The total reflectance  $R$  of the surface and bottom reflectance is calculated by the following formula:

$$R = R_1 + R_1(1 - R_1)^2 e^{-2\mu_p l} \quad (12)$$

The refractive index can be calculated by the following formula:

$$n' = n + ik \quad (13)$$

$R_1$  can also be calculated by the Fresnel equation:

$$R_1 = \left| \frac{n_{SEBS} - n_{air}}{n_{SEBS} + n_{air}} \right|^2 \quad (14)$$

$$\mu_p = \frac{4\pi k}{\lambda_0} \quad (15)$$

where  $n$  is the real part of the refraction index,  $k$  is the imaginary part of the index of refraction (extinction coefficient).  $n_{SEBS}$  and  $n_{air}$  are the refractive index of SEBS and air in the mid-infrared band, take the  $n_{air} = 1$ ,  $\lambda_0$  is the wavelength.

According to Kirchhoff's law:  $\alpha$  can be derived as:

$$\alpha = 1 - R - \tau = (1 - R_1) - (1 - R_1)^2 e^{-\mu_p d} - R_1(1 - R_1)^2 e^{-2\mu_p l} \quad (16)$$

#### Section S4: Spectral modulation calculation

Assuming that SEBS@Ag film has the original length  $l$  and the stretched length becomes  $l'$ , then its change in length  $\Delta l = l' - l$ , and the stretch strain  $\varepsilon$  is the ratio of the change  $\Delta l$  to the original length  $l$ , as follows:

$$\varepsilon = \frac{\Delta l}{l} \quad (17)$$

To simplify the calculation model, the volume of SEBS film, the surface area of Ag film, and the width of the film did not change during the stretching process.

$$V = lbh \quad (18)$$

where  $V$ ,  $l$ ,  $b$ , and  $h$  are the volume, length, width, and thickness of SEBS film, respectively.

During the stretching process, its volume does not change, so there is the following equation:

$$V = lbh = (l + \varepsilon l)bh' \quad (19)$$

Therefore, the thickness after stretching is:

$$h' = \frac{1}{1 + \varepsilon}h \quad (20)$$

When the strain was 0 %, 100 %, and 200 %, the thickness would be  $1h$ ,  $1/2h$ , and  $1/3h$  (**Figure S7**). Due to the bottom Ag layer being highly reflective, mid-infrared absorption occurs twice where the Ag is covered. Therefore, the effective intrinsic absorption thickness after stretching is:

$$h'' = \left( \frac{l}{l + \varepsilon l} \times 2 + \frac{\varepsilon l}{l + \varepsilon l} \times 1 \right) h' = \frac{(2 + \varepsilon)}{(1 + \varepsilon)^2} h \quad (21)$$

The effective intrinsic absorption thickness of SEBS film was  $2h$ ,  $3/4h$ , and  $4/9h$  under strain of 0 %, 100 %, and 200 % (**Figure S4**). Solar reflectance was related to the area occupied by the underlying Ag, so the solar reflectance after stretching is:

$$R' = \left( \frac{l}{l + \varepsilon l} \right) R = \frac{1}{1 + \varepsilon} R \quad (22)$$

When the strain was 100 % and 200 %, the solar reflectance would become  $1/2$  and  $1/3$  of the original release state.

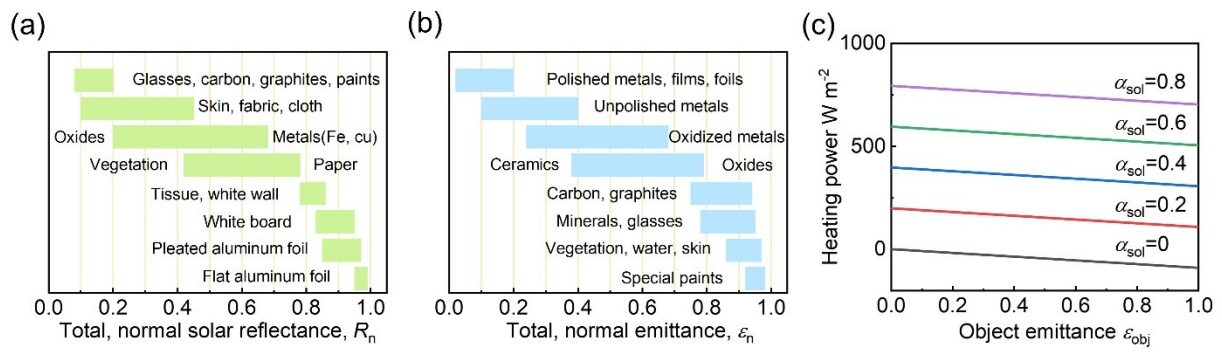

**Figure S1** The total, normal (a) solar reflectance and (b) thermal emittance of some common objects. (c) Under the ideal condition of SEBS@Ag film stretching state, when the solar absorptance of the lower object is different, the heating power of the whole system changes with the thermal emittance of the object.



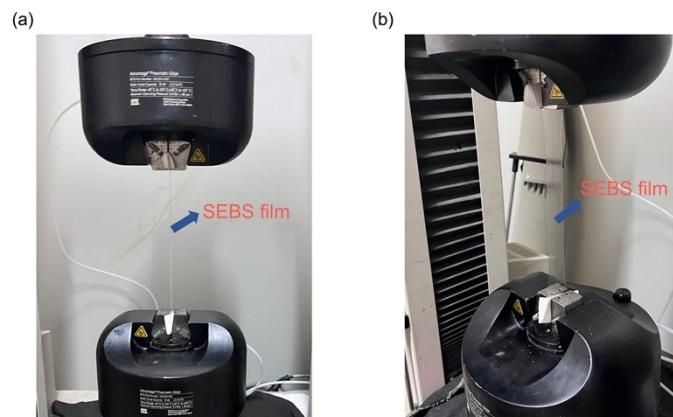

**Figure S2** SEBS film stretching physical pictures.

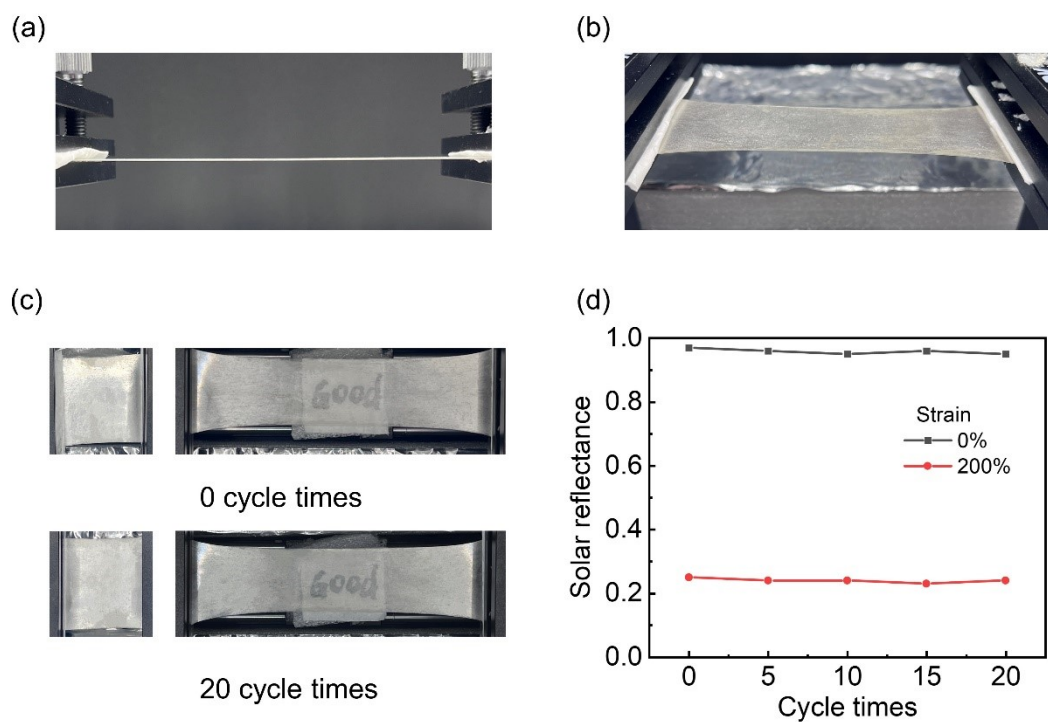

**Figure S3** (a) and (b) Optical images of SEBS@Ag film in the stretching process. Optical image (c) and solar reflectance (d) after multiple stretching cycle times.

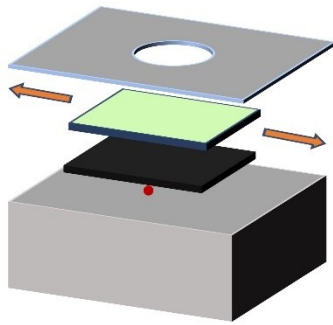

**Figure S4** Mechanical stretching diagram of outdoor experimental SEBS@Ag film.

(a)

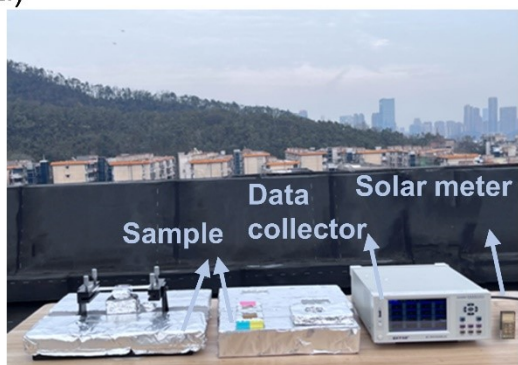

(b)

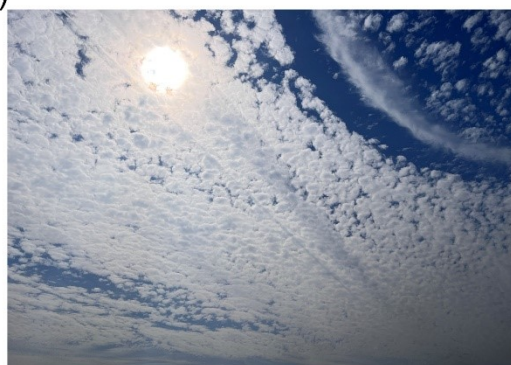

**Figure S5** (a) Outdoor test diagram. (b) Cloudy sky in the afternoon of 2024-03-12.

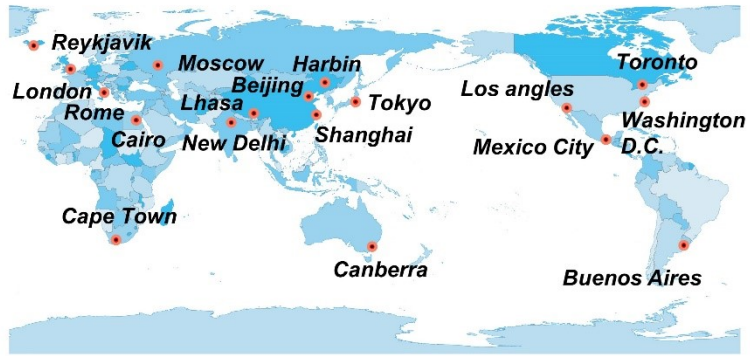

**Figure S6** Map of 18 typical cities around the world.

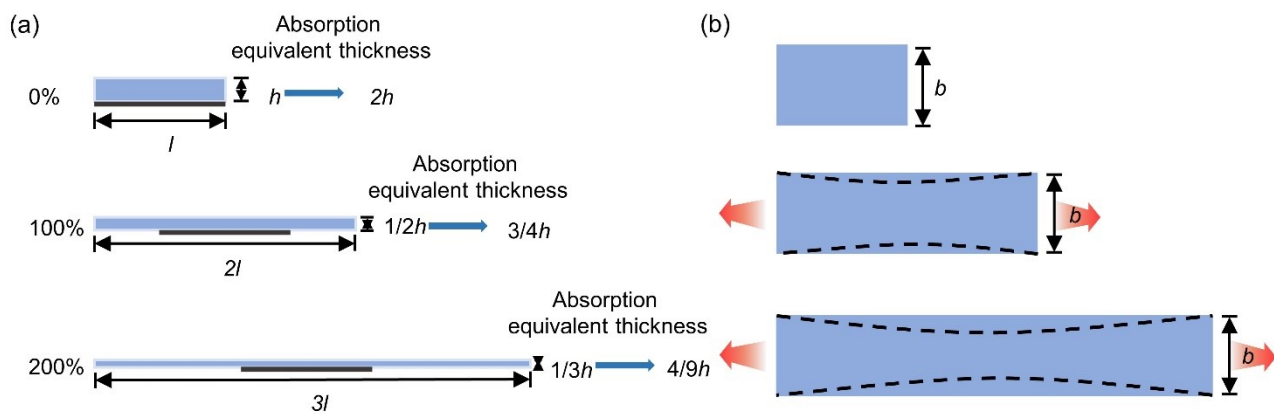

**Figure S7** Theoretical analysis of stretch strain. (a) The side and (b) top view of the film stretches (The dashed line shows the actual width change).

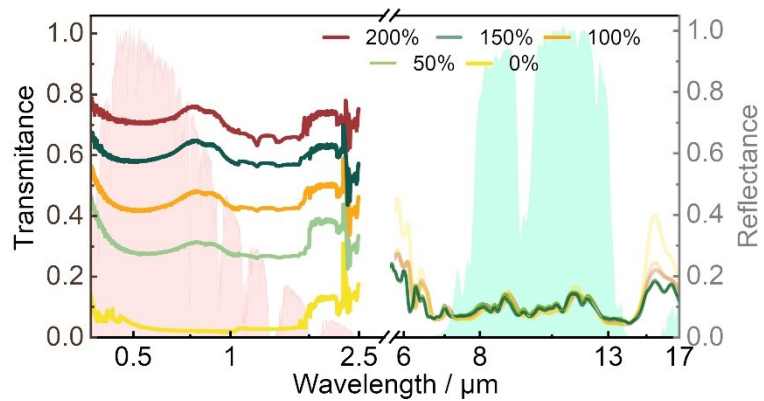

**Figure S8** Changes of solar reflectance and mid-infrared transmittance of SEBS@Ag film (The thickness ~ 300  $\mu\text{m}$ ) at 0 %, 50 %, 100 %, 150 % and 200 % strain.

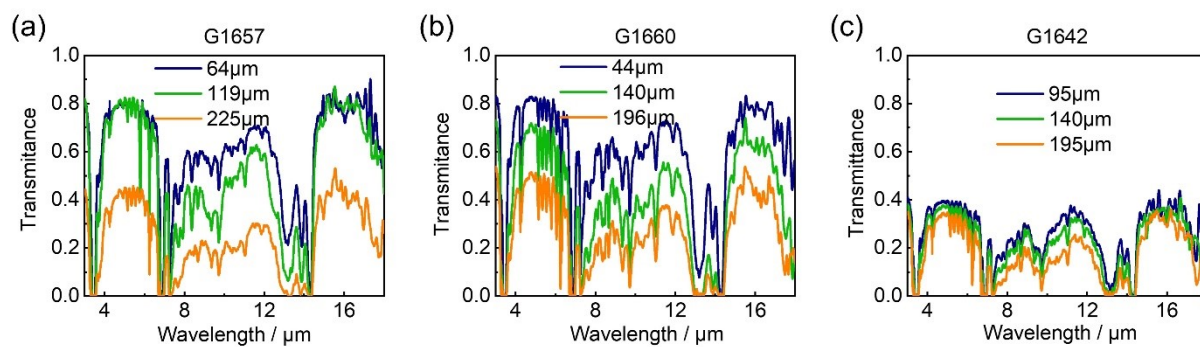

**Figure S9** Spectral transmittance under different thicknesses for (a) G1657 SEBS films, (b) G1660 SEBS films, and (c) G1642 SEBS films.



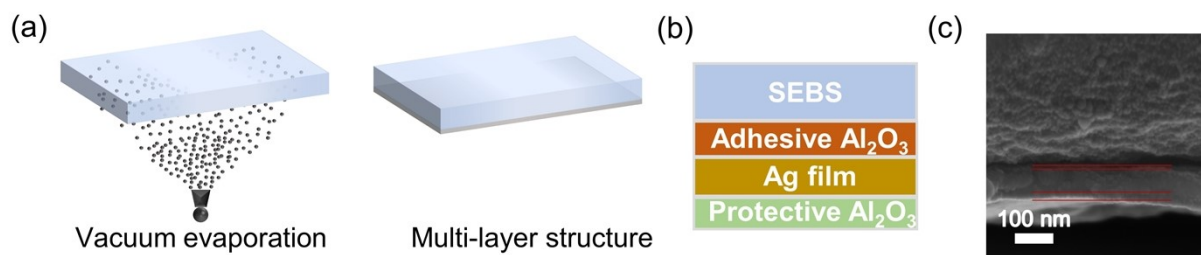

**Figure S10** Multilayer structure of SEBS@Ag film. (a) Vacuum evaporation diagram of the SEBS@Ag film during silver plating. (b) Schematic diagram of the layered structure of the SEBS@Ag film. (c) SEM image of SEBS@Ag film cross-section stratification structure.

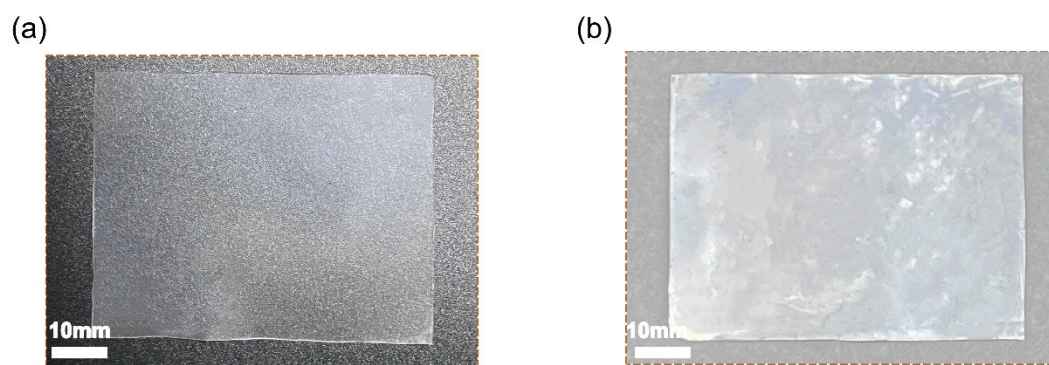

**Figure S11** Optical images of the (a) SEBS film and (b) SEBS@Ag film.

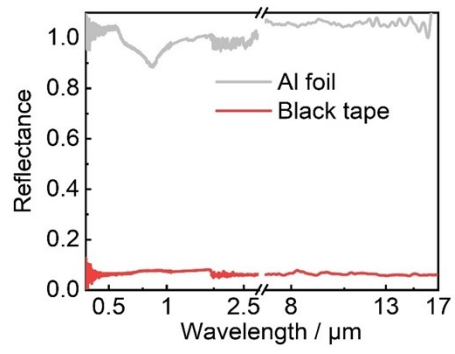

**Figure S12** Full spectral reflectance of Al foil and black tape.

**Table S1 Comparison and summary of various thermal radiative regulations.**

| Category              | Material                                                                                         | Modulation                                                 | Advantage                                                | Remark |
|-----------------------|--------------------------------------------------------------------------------------------------|------------------------------------------------------------|----------------------------------------------------------|--------|
| <b>Electrochromic</b> | Micro wrinkle TiO <sub>2</sub> Films <sup>1</sup>                                                | $0.79(\Delta T_{\text{sol}})$                              | Low-cost, durable, high performance                      | 2018   |
|                       | Reversible electro-deposition <sup>2</sup>                                                       | $0.76(\Delta T_{\text{vis}})$                              | Fast response, excellent uniformity                      | 2021   |
|                       | Kirigami-enabled electrochromic thin film <sup>3</sup>                                           | $0.27(\Delta \epsilon_{\text{LWIR}})$                      | Programmable personalized thermoregulation               | 2022   |
|                       | Electrodepositing Cu on the transparent electrode <sup>4</sup>                                   | $0.85(\Delta \epsilon_{\text{MIR}})$                       | Fast response speed                                      | 2022   |
| <b>Thermochromic</b>  | The hydrogel-derived liquid <sup>5</sup>                                                         | $0.90(\Delta T_{\text{vis}}), 0.68(\Delta T_{\text{sol}})$ | Easy fabrication, good uniformity, scalability           | 2020   |
|                       | Thermo-Responsive Hydrogel <sup>6</sup>                                                          | $0.91(\Delta T_{\text{vis}}), 0.82(\Delta T_{\text{sol}})$ | Good indoor temperature regulation ability and stability | 2023   |
|                       | VO <sub>2</sub> /MgF <sub>2</sub> /W <sup>7</sup>                                                | $0.58(\Delta \epsilon_{\text{MIR}})$                       | Without any extra energy input                           | 2018   |
|                       | CaF <sub>2</sub> /VO <sub>2</sub> Core-shell microsphere <sup>8</sup>                            | $0.36(\Delta \epsilon_{\text{MIR}})$                       | Self-regulating, completely passive, flexible            | 2021   |
|                       | Al <sub>2</sub> O <sub>3</sub> /VO <sub>2</sub> /Al <sub>2</sub> O <sub>3</sub> /Al <sup>9</sup> | $0.50(\Delta \epsilon_{\text{MIR}})$                       | Efficient energy harvesting                              | 2022   |
| <b>Mechanochromic</b> | silica particles embedded in bulk elastomeric PDMS <sup>10</sup>                                 | $\sim 0.60(\Delta T_{\text{vis}})$                         | Low-cost, facile, highly robust                          | 2015   |

|                                                                                                    |                                                                            |                                                  |           |
|----------------------------------------------------------------------------------------------------|----------------------------------------------------------------------------|--------------------------------------------------|-----------|
| PDMS layer embedded with nanoparticles: SiC, Si <sub>3</sub> N <sub>4</sub> , and BN <sup>11</sup> | 0.64( $\Delta\epsilon_{\text{MIR}}$ )                                      | Low-cost, simple preparation process             | 2020      |
| Multi-layered structure cephalopod-inspired system <sup>12</sup>                                   | 0.32( $\Delta\epsilon_{\text{MIR}}$ )                                      | Instantaneous response, feasibility              | 2021      |
| Wrinkles and cracks in PEDOT: PSS and PDMS <sup>13</sup>                                           | 0.55( $\Delta T_{\text{sol}}$ ), 0.25( $\Delta R_{\text{MIR}}$ )           | Clever structure, simple preparation process     | 2022      |
| Dynamic dual-mode thermal-management device <sup>14</sup>                                          | 0.38( $\Delta\alpha_{\text{sol}}$ ), 0.67( $\Delta\epsilon_{\text{MIR}}$ ) | Environmentally friendly, zero-energy            | 2022      |
| Multi-layer structure SEBS@Ag film                                                                 | 0.72( $\Delta T_{\text{sol}}$ ), 0.3( $\Delta\epsilon_{\text{LWIR}}$ )     | Environmentally friendly, large modulation range | This work |

$\Delta T_{\text{sol}}$  and  $\Delta T_{\text{vis}}$  represent the transmittance modulation in the solar spectrum and visible spectrum.

$\Delta\alpha_{\text{sol}}$ ,  $\Delta\epsilon_{\text{LWIR}}$ , and  $\Delta\epsilon_{\text{MIR}}$  represent the solar absorptance modulation, thermal emittance modulation in the atmosphere's long-wave infrared transmission window (8 – 13  $\mu\text{m}$ ), and the mid-infrared spectrum (2.5 – 30  $\mu\text{m}$ ).

$\Delta R_{\text{sol}}$ ,  $\Delta R_{\text{LWIR}}$ , and  $\Delta R_{\text{MIR}}$  represent the reflectance modulation in the solar spectrum, the atmosphere's long-wave infrared transmission window (8 – 13  $\mu\text{m}$ ), and the mid-infrared spectrum (2.5 – 30  $\mu\text{m}$ ).

**Table S2 Annual total energy consumption comparison data.**

| City                                       | Canberra | Los angles | Mexico City | Toronto   | Washington D.C. | Buenos Aires | New Delhi | Lhasa     | Beijing |
|--------------------------------------------|----------|------------|-------------|-----------|-----------------|--------------|-----------|-----------|---------|
| SEBS@Ag film covered standard glasses / GJ | 46.4     | 36.0       | 34.8        | 106.4     | 81.4            | 34.2         | 50.8      | 70.0      | 80.7    |
| Standard glass / GJ                        | 82.6     | 79.5       | 74.0        | 142.7     | 117.3           | 75.2         | 117.2     | 87.9      | 113.5   |
| Energy saving (vs. standard glass)         | 43.8%    | 54.7%      | 53.0%       | 25.4%     | 30.6%           | 54.5%        | 56.7%     | 20.4%     | 28.9%   |
| City                                       | Harbin   | Shanghai   | Tokyo       | Reykjavik | London          | Rome         | Cairo     | Cape Town | Moscow  |
| SEBS@Ag film covered standard glasses / GJ | 146.5    | 53.5       | 64.2        | 114.1     | 107.6           | 50.3         | 47.0      | 35.1      | 121.6   |
| Standard glass / GJ                        | 184.4    | 84.8       | 88.5        | 144.9     | 143.1           | 91.5         | 102.8     | 77.9      | 155.6   |
| Energy saving (vs. standard glass)         | 20.6%    | 36.9%      | 27.5%       | 21.3%     | 24.8%           | 45.0%        | 54.3%     | 54.9%     | 21.9%   |

## References

1. Shrestha, M. Asundi, A. Lau, G. K. Smart window based on electric unfolding of microwrinkled TiO<sub>2</sub> nanometric films. *ACS Photonics*. **5**, 3255–3262 (2018).
2. Strand, MT. Hernandez, TS. Danner, MG. Yeang, AL. Jarvey, N. Barile, CJ. McGehee, MD. Polymer inhibitors enable >900 cm<sup>2</sup> dynamic windows based on reversible metal electrodeposition with high solar modulation. *Nat. Energy*. **6**, 546–554 (2021).
3. Chen, TH. Hong, YY. Fu, CT. Nandi, AK. Xie, WR. Yin, J. Hsu, PC. A kirigami-enabled electrochromic wearable variable emittance ( WeaVE ) device for energy- efficient adaptive personal thermoregulation. *PANS nexus*. **2**, 6 (2023).
4. Sui, C. Pu, J. Chen, TH. Lai, YT. Rao, YF. Li, X. L, J. Viswanathan, V. Hsu, PC. Aqueous mid-infrared electrically switchable opaque building envelopes for all-season radiative thermoregulation. *Research Square*. (2022).
5. Zhou, Y. Wang, S. Peng, J. Tan, Y. Li, C. Boey, F. Long, Y. Liquid thermo-responsive smart window derived from hydrogel. *Joule*. **4**, 2458–2474 (2020).
6. Wang, K. Chen, G. Weng, S. Hou, L. Ye, D. Jiang, X. Thermo-responsive poly(N-isopropylacrylamide)/hydroxypropylmethyl cellulose hydrogel with high luminous transmittance and solar modulation for smart windows. *ACS Appl. Mater. Interfaces*. **15**, 3, 4385-4397 (2023).
7. Ono, M. Takata, M. Shirata, M. Yoshihiro, T. Tani, T. Naya, M. Saiki, T. Self-adaptive control of infrared emissivity in a solution-processed plasmonic structure. *Opt. Express*. **29**, 36048 (2021).
8. Wu, X. Yuan, L. Weng, X. Qi, L. Wei, B. He W. Passive smart thermal control

- coatings incorporating  $\text{CaF}_2/\text{VO}_2$  core-shell microsphere structures. *Nano Lett.* **21**, 3908–3914 (2021).
9. Ao, XZ. Li, BW. Zhao, B. Hu, MK. Ren, H. Yang, HL. Liu, J. Cao, JY. Feng, JS. Yang, YJ. Qi, ZM. Li, LB. Zou, CW. Pei, G. Self-adaptive integration of photothermal and radiative cooling for continuous energy harvesting from the sun and outer space. *Proc. Natl. Acad. Sci. U. S. A.* **119**, e2120557119 (2022).
  10. Ge, D. Lee, E. Yang, L. Cho, Y. Li, M. Gianola, D. Yang, S. A robust smart window: reversibly switching from high transparency to angle-independent structural color display. *Advanced Materials.* **27**, 15, 2489–2495 (2015).
  11. Liu, XJ. Tian, YP. Chen, FQ. Ghanekar, A. Antezza, M. Zheng, Y. Continuously variable emission for mechanical deformation induced radiative cooling. *Commun. Mater.* **1**, 95 (2020).
  12. Zeng, SS. Shen, KY. Liu, Y. Chooi, AP. Smith, AT. Zhai, SH. Chen, Z. Sun, LY. Dynamic thermal radiation modulators via mechanically tunable surface emissivity. *Mater. Today.* **45**, 44–53 (2021).
  13. Zhou, ZG. Fang, YS. Wang, X. Yang, EQ. Liu, R. Zhou, XS. Huang, Z. Yin, HZ. Zhou, J. Hu, B. Synergistic modulation of solar and thermal radiation in dynamic energy-efficient windows. *Nano Energy.* **93**, 106865 (2022).
  14. Zhang, Q. Lv, YW. Wang, YF. Yu, SX. Li, CX. Ma, RJ. Chen, YS. Temperature-dependent dual-mode thermal management device with net zero energy for year-round energy saving. *Nat. Commun.* **13**, 4874 (2022).
